# Supplementary material for: Rate and risk factors of recurrent immune checkpoint inhibitor-related pneumonitis in patients with lung cancer
Source: PubMed Central journal article supplement — Transl Lung Cancer Res. 2022 Mar;11(3):381–92. doi: 10.21037/tlcr-22-168 (PMC8988083; doi:10.21037/tlcr-22-168), 2022-03
Supplement: tlcr-11-03-381-dss.pdf [file tlcr-11-03-381-dss.pdf]

## Data Sharing Statement

|                     |                                                                                                                                                     |                                                                                                                                                                                              |
|---------------------|-----------------------------------------------------------------------------------------------------------------------------------------------------|----------------------------------------------------------------------------------------------------------------------------------------------------------------------------------------------|
| <b>Article Info</b> | <a href="https://dx.doi.org/10.21037/tlcr-22-168">https://dx.doi.org/10.21037/tlcr-22-168</a>                                                       |                                                                                                                                                                                              |
| <b>Item</b>         | <b>Question</b>                                                                                                                                     | <b>Authors' Response<br/>(place "-" if not applicable)</b>                                                                                                                                   |
| 1                   | Would you like to share data collected for your study to others?                                                                                    | Yes.                                                                                                                                                                                         |
| 2                   | If not, would you like to share the reason for your decision?                                                                                       | -                                                                                                                                                                                            |
| 3                   | What data in particular will be shared?                                                                                                             | De-identified patient data.                                                                                                                                                                  |
| 4                   | Any other documents will be shared? Such as study protocol, statistical analysis plan, informed consent form, clinical study report, analytic code. | No.                                                                                                                                                                                          |
| 5                   | When will data availability begin?                                                                                                                  | Six months after publication.                                                                                                                                                                |
| 6                   | When will data availability end?                                                                                                                    | Two years within the publication date.                                                                                                                                                       |
| 7                   | To whom will you share the data?                                                                                                                    | Medical oncologists and researchers who are interested in this study.                                                                                                                        |
| 8                   | For what type of analysis or purpose?                                                                                                               | For research purposes.                                                                                                                                                                       |
| 9                   | How or where can the data/documents be obtained?                                                                                                    | Requests should be sent to <a href="mailto:huyi301zlx@sina.com">huyi301zlx@sina.com</a> .<br>Data use agreements can be put in place for data sharing after considering individual requests. |
| 10                  | Any other restrictions?                                                                                                                             | We may balance the potential benefits and risks for each request and then provide the data that could be shared.                                                                             |
