# Supplementary material for: Rate and risk factors of recurrent immune checkpoint inhibitor-related pneumonitis in patients with lung cancer
Source: PubMed Central journal article supplement — Transl Lung Cancer Res. 2022 Mar;11(3):381–92. doi: 10.21037/tlcr-22-168 (PMC8988083; doi:10.21037/tlcr-22-168), 2022-03
Supplement: tlcr-11-03-381-supplementary.pdf [file tlcr-11-03-381-supplementary.pdf]

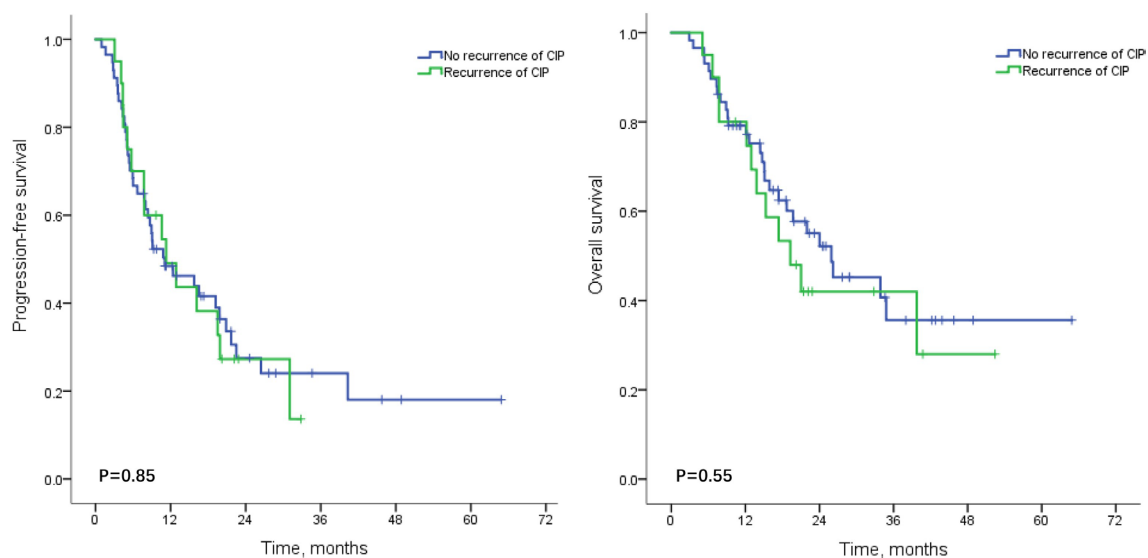

**Figure S1** Kaplan-Meier estimates for PFS and OS after ICIs initiation stratified by CIP status. PFS, progression-free survival; OS, overall survival; ICIs, immune checkpoint inhibitors; CIP, checkpoint inhibitor-related pneumonitis.
